# Supplementary material
Source: Research Square preprint supplement (doi:10.21203/rs.3.rs-9053932/v1)
Supplement: Supplementary file 1 [file 4a59680dfb8cdab741cc3183.xlsx]

## Sheet: Supp Table 1. List of SRRs
Supplementary Table 1. List of SRRs of the 62 publicly available Illumina short-read sequences of F. graminearum isolates with known population assignment
SRR	Isolate	Species	MLGT Chemotype	Assigned Pop	State	Country	Year	Host	Reference
SRR5948942	37408	Fusarium graminearum	15ADON	NA1	Alberta	Canada	2004	wheat	Ward et al. 2008
SRR5948943	37450	Fusarium graminearum	15ADON	NA1	Manitoba	Canada	2004	wheat	Ward et al. 2008
SRR5948944	37509	Fusarium graminearum	15ADON	NA1	Saskatchewan	Canada	2004	wheat	Ward et al. 2008
SRR5948945	47571	Fusarium graminearum	15ADON	NA1	Quebec	Canada	2007	wheat	Kelly et al. 2015
SRR5948946	52005	Fusarium graminearum	15ADON	NA1	Manitoba	Canada	2007	wheat	Kelly et al. 2015
SRR5948947	52129	Fusarium graminearum	15ADON	NA1	Saskatchewan	Canada	2007	wheat	Kelly et al. 2015
SRR5948948	52512	Fusarium graminearum	15ADON	NA1	Alberta	Canada	2007	wheat	Kelly et al. 2015
SRR5948949	52840	Fusarium graminearum	15ADON	NA1	New Brunswick	Canada	2007	wheat	Kelly et al. 2015
SRR5948950	52850	Fusarium graminearum	15ADON	NA1	New Brunswick	Canada	2007	wheat	Kelly et al. 2015
SRR5948951	52955	Fusarium graminearum	15ADON	NA1	Ontario	Canada	2007	wheat	Kelly et al. 2015
SRR5948956	F325	Fusarium graminearum	15ADON	NA1	South Dakota	US	2000	wheat	Liang et al. 2015
SRR5948957	F327	Fusarium graminearum	15ADON	NA1	Minnesota	US	2000	wheat	Liang et al. 2015
SRR5948958	F330	Fusarium graminearum	15ADON	NA1	North Dakota	US	2006	wheat	Liang et al. 2015
SRR5948959	F331	Fusarium graminearum	15ADON	NA1	North Dakota	US	2006	wheat	Liang et al. 2015
SRR5948952	F333	Fusarium graminearum	15ADON	NA1	North Dakota	US	2006	wheat	Liang et al. 2015
SRR5948953	F336	Fusarium graminearum	15ADON	NA1	South Dakota	US	2006	wheat	Liang et al. 2015
SRR5948954	F337	Fusarium graminearum	15ADON	NA1	South Dakota	US	2006	wheat	Liang et al. 2015
SRR5948955	F338	Fusarium graminearum	15ADON	NA1	Minnesota	US	2013	wheat	Liang et al. 2015
SRR5948962	F342	Fusarium graminearum	15ADON	NA1	South Dakota	US	2011	wheat	Liang et al. 2015
SRR5948963	F344	Fusarium graminearum	15ADON	NA1	South Dakota	US	2011	wheat	Liang et al. 2015
SRR5948916	37401	Fusarium graminearum	3ADON	NA2	Alberta	Canada	2004	wheat	Ward et al. 2008
SRR5948915	37425	Fusarium graminearum	3ADON	NA2	Manitoba	Canada	2004	wheat	Ward et al. 2008
SRR5948918	37525	Fusarium graminearum	3ADON	NA2	Saskatchewan	Canada	2004	wheat	Ward et al. 2008
SRR5948917	46422	Fusarium graminearum	3ADON	NA2	Minnesota	US	2000	wheat	Gale et al. 2007
SRR5948920	46434	Fusarium graminearum	3ADON	NA2	North Dakota	US	2000	wheat	Gale et al. 2007
SRR5948919	47588	Fusarium graminearum	3ADON	NA2	Quebec	Canada	2007	wheat	Kelly et al. 2015
SRR5948922	52008	Fusarium graminearum	3ADON	NA2	Manitoba	Canada	2007	wheat	Kelly et al. 2015
SRR5948921	52195	Fusarium graminearum	3ADON	NA2	Saskatchewan	Canada	2007	wheat	Kelly et al. 2015
SRR5948924	52429	Fusarium graminearum	3ADON	NA2	Alberta	Canada	2007	wheat	Kelly et al. 2015
SRR5948923	52847	Fusarium graminearum	3ADON	NA2	New Brunswick	Canada	2007	wheat	Kelly et al. 2015
SRR5948976	53046	Fusarium graminearum	3ADON	NA2	Ontario	Canada	2007	wheat	Kelly et al. 2015
SRR5948978	53184	Fusarium graminearum	3ADON	NA2	Prince Edward Island	Canada	2007	wheat	Kelly et al. 2015
SRR5948969	F326	Fusarium graminearum	3ADON	NA2	Minnesota	US	2000	wheat	Liang et al. 2015
SRR5948975	F328	Fusarium graminearum	3ADON	NA3	Minnesota	US	2006	wheat	Liang et al. 2015
SRR5948911	F329	Fusarium graminearum	3ADON	NA2	Minnesota	US	2006	wheat	Liang et al. 2015
SRR5948913	F332	Fusarium graminearum	3ADON	NA2	North Dakota	US	2006	wheat	Liang et al. 2015
SRR5948979	F334	Fusarium graminearum	3ADON	NA2	North Dakota	US	2006	wheat	Liang et al. 2015
SRR5948910	F335	Fusarium graminearum	3ADON	NA2	North Dakota	US	2006	wheat	Liang et al. 2015
SRR5948960	F341	Fusarium graminearum	3ADON	NA2	North Dakota	US	2011	wheat	Liang et al. 2015
SRR5948961	F343	Fusarium graminearum	3ADON	NA2	South Dakota	US	2012	wheat	Liang et al. 2015
SRR5948938	43161	Fusarium graminearum	NX2	NA3	Manitoba	Canada	2005	oat	Kelly et al. 2016
SRR5948937	43884	Fusarium graminearum	NX2	NA3	Ontario	Canada	2006	wheat	Kelly et al. 2015
SRR5948936	44070	Fusarium graminearum	NX2	admixed	Ontario	Canada	2006	wheat	Kelly et al. 2015
SRR5948935	44078	Fusarium graminearum	NX2	admixed	Ontario	Canada	2006	wheat	Kelly et al. 2015
SRR5948934	44211	Fusarium graminearum	NX2	NA3	Saskatchewan	Canada	2006	wheat	Kelly et al. 2015
SRR5948933	45156	Fusarium graminearum	NX2	admixed	Quebec	Canada	2006	wheat	Kelly et al. 2015
SRR5948932	45373	Fusarium graminearum	NX2	admixed	Connecticutt	US	2006	corn	Kelly et al. 2016
SRR5948931	47605	Fusarium graminearum	NX2	admixed	Quebec	Canada	2007	wheat	Kelly et al. 2015
SRR5948940	47659	Fusarium graminearum	NX2	NA3	Quebec	Canada	2007	wheat	Kelly et al. 2015
SRR5948939	53173	Fusarium graminearum	NX2	admixed	Prince Edward Island	Canada	2007	wheat	Kelly et al. 2015
SRR5948965	66030	Fusarium graminearum	NX2	NA3	Minnesota	US	2006	wheat	Liang et al. 2015
SRR5948966	66031	Fusarium graminearum	NX2	NA3	Minnesota	US	2012	wheat	Liang et al. 2015
SRR5948967	66040	Fusarium graminearum	NX2	NA3	Minnesota	US	2006	wheat	Liang et al. 2015
SRR5948968	66041	Fusarium graminearum	NX2	admixed	North Dakota	US	2004	wheat	Liang et al. 2015
SRR5948914	66042	Fusarium graminearum	NX2	NA3	North Dakota	US	2004	wheat	Liang et al. 2015
SRR5948970	66043	Fusarium graminearum	NX2	NA3	Minnesota	US	2004	wheat	Liang et al. 2015
SRR5948971	66044	Fusarium graminearum	NX2	NA3	North Dakota	US	2003	wheat	Liang et al. 2015
SRR5948972	66045	Fusarium graminearum	NX2	NA3	North Dakota	US	2003	wheat	Liang et al. 2015
SRR5948973	66047	Fusarium graminearum	NX2	NA3	Minnesota	US	2000	wheat	Liang et al. 2015
SRR5948974	66049	Fusarium graminearum	NX2	admixed	Minnesota	US	2000	wheat	Liang et al. 2015
SRR25491027	KSU23522	Fusarium graminearum		NA2	Minnesota	US	2000	wheat	Dhakal et al., 2024
SRR29786658	KSU23468	Fusarium graminearum		NA1	North Dakota	US	1999	wheat	Dhakal et al., 2024

## Sheet: Supp Table 2. rank_cross_infect
Supplementary Table 2. Ranking of F. graminearum isolates in each crop. Ranking was based on the statistical analysis of each severity rating scale. Isolates with the sum of ranks below the median (equal to 12) was categorized as more aggressive.
Isolate Code	Severity in barley - Rank	Severity in potato - Rank	Severity in soybean - Rank	Sum - Rank
By354	4.5	2	3.5	10
By355	4.5	2	1	7.5
Po378	4.5	2	3.5	10
Sy357	1.5	7	3.5	12
Sy362	4.5	5	3.5	13
Sy364	7	4	6.5	17.5
Wr386	1.5	6	6.5	14

## Sheet: Supp Table 3. inspector_NECAT
Supplementary Table 3. Assembly statistics after draft assembly using NECAT.
Parameter	F. graminearum isolates
	By354	By355	Sy357	Sy362	Sy364	Po378	Wr386
Statics of contigs:
Number of contigs	5	4	4	4	4	4	4
Number of contigs > 10000 bp	5	4	4	4	4	4	4
Number of contigs >1000000 bp	4	4	4	4	4	4	4
Total length	37569109	36918026	36598233	37007692	36794483	37136911	36565492
Total length of contigs > 10000 bp	37569109	36918026	36598233	37007692	36794483	37136911	36565492
Total length of contigs >1000000bp	36976949	36918026	36598233	37007692	36794483	37136911	36565492
Longest contig	11856208	11865883	11661339	11895594	11828201	11830277	11713826
Second longest contig length	9073815	9049777	9085015	9105496	9077939	9129388	9079393
N50	9073815	9049777	9085015	9105496	9077939	9129388	9079393
N50 of contigs >1Mbp	9073815	9049777	9085015	9105496	9077939	9129388	9079393
Read to Contig alignment:
Mapping rate /%	80.56	88.41	83.96	84.21	82.63	80.27	87.4
Split-read rate /%	0.56	0.92	0.65	0.49	0.91	0.68	0.68
Depth	58.7091	108.843	77.8937	101.216	88.308	59.7424	94.3584
Mapping rate in large contigs /%	78.5	88.41	83.96	84.21	82.63	80.27	87.4
Split-read rate in large contigs /%	0.56	0.92	0.65	0.49	0.91	0.68	0.68
Depth in large conigs	58.1383	108.843	77.8937	101.216	88.308	59.7424	94.3584
Structural error	2	1	1	2	2	4	3
Expansion	1	1	1	1	1	0	1
Collapse	1	0	0	1	1	4	2
Haplotype switch	0	0	0	0	0	0	0
Inversion	0	0	0	0	0	0	0
Small-scale assembly error /per Mbp	32.6066	31.6647	37.5701	39.5864	30.7655	31.7474	35.7167
Total small-scale assembly error	1225	1169	1375	1465	1132	1179	1306
Base substitution	336	249	559	476	331	317	419
Small-scale expansion	726	762	676	776	673	691	679
Small-scale collapse	163	158	140	213	128	171	208
QV	44.4168	44.5727	44.0861	43.5871	44.6356	44.0302	43.8216

## Sheet: Supp Table 4. inspector_RACON
Supplementary Table 4. Assembly statistics after polishing the draft assembly using RACON.
Parameter	F. graminearum isolates
	By354	By355	Sy357	Sy362	Sy364	Po378	Wr386
Statics of contigs:
Number of contigs	5	4	4	4	4	4	4
Number of contigs > 10000 bp	5	4	4	4	4	4	4
Number of contigs >1000000 bp	4	4	4	4	4	4	4
Total length	37562637	36910609	36592670	37001695	36791105	37132313	36561942
Total length of contigs > 10000 bp	37562637	36910609	36592670	37001695	36791105	37132313	36561942
Total length of contigs >1000000bp	36971223	36910609	36592670	37001695	36791105	37132313	36561942
Longest contig	11854450	11862761	11658914	11892504	11826719	11828526	11711963
Second longest contig length	9072039	9048921	9084627	9104734	9077684	9129090	9079067
N50	9072039	9048921	9084627	9104734	9077684	9129090	9079067
N50 of contigs >1Mbp	9072039	9048921	9084627	9104734	9077684	9129090	9079067
Read to Contig alignment:
Mapping rate /%	80.56	88.42	83.97	84.22	82.63	80.27	87.4
Split-read rate /%	0.56	0.93	0.65	0.49	0.92	0.68	0.68
Depth	58.7215	108.87	77.907	101.236	88.3206	59.7514	94.3708
Mapping rate in large contigs /%	78.51	88.42	83.97	84.22	82.63	80.27	87.4
Split-read rate in large contigs /%	0.57	0.93	0.65	0.49	0.92	0.68	0.68
Depth in large conigs	58.1497	108.87	77.907	101.236	88.3206	59.7514	94.3708
Structural error	2	1	0	2	1	1	1
Expansion	1	0	0	1	0	0	0
Collapse	1	1	0	1	1	1	1
Haplotype switch	0	0	0	0	0	0	0
Inversion	0	0	0	0	0	0	0
Small-scale assembly error /per Mbp	12.1131	15.6595	16.7793	15.5128	10.4645	9.23724	12.8002
Total small-scale assembly error	455	578	614	574	385	343	468
Base substitution	11	15	193	8	3	5	4
Small-scale expansion	339	374	315	338	321	317	324
Small-scale collapse	105	189	106	228	61	21	140
QV	47.524	45.4114	47.7485	41.4717	44.3463	46.5293	44.6905

## Sheet: Supp Table 5. inspector_RACON+P
Supplementary Table 4. Assembly statistics of final assembly after polishing with Illumina sequences using Pilon.
Parameter	F. graminearum isolates
	By354	By355	Sy357	Sy362	Sy364	Po378	Wr386
Statics of contigs:
Number of contigs	5	4	4	4	4	4	4
Number of contigs > 10000 bp	5	4	4	4	4	4	4
Number of contigs >1000000 bp	4	4	4	4	4	4	4
Total length	37562703	36910886	36592799	37000554	36791154	37132289	36562154
Total length of contigs > 10000 bp	37562703	36910886	36592799	37000554	36791154	37132289	36562154
Total length of contigs >1000000bp	36971288	36910886	36592799	37000554	36791154	37132289	36562154
Longest contig	11854523	11862830	11658933	11892581	11826751	11828528	11712009
Second longest contig length	9072070	9048981	9084688	9103329	9077665	9129084	9079124
N50	9072070	9048981	9084688	9103329	9077665	9129084	9079124
N50 of contigs >1Mbp	9072070	9048981	9084688	9103329	9077665	9129084	9079124
Read to Contig alignment:
Mapping rate /%	80.56	88.42	83.97	84.22	82.63	80.28	87.4
Split-read rate /%	0.56	0.93	0.65	0.49	0.92	0.68	0.68
Depth	58.7214	108.869	77.9068	101.239	88.3205	59.7517	94.3712
Mapping rate in large contigs /%	78.51	88.42	83.97	84.22	82.63	80.28	87.4
Split-read rate in large contigs /%	0.57	0.93	0.65	0.49	0.92	0.68	0.68
Depth in large conigs	58.1495	108.869	77.9068	101.239	88.3205	59.7517	94.3712
Structural error	1	1	1	1	1	1	1
Expansion	0	0	0	0	0	0	0
Collapse	1	1	1	1	1	1	1
Haplotype switch	0	0	0	0	0	0	0
Inversion	0	0	0	0	0	0	0
Small-scale assembly error /per Mbp	10.2495	14.386	15.4129	9.9458	9.4588	9.29111	9.49069
Total small-scale assembly error	385	531	564	368	348	345	347
Base substitution	9	117	227	2	0	0	0
Small-scale expansion	371	401	327	354	345	340	343
Small-scale collapse	5	13	10	12	3	5	4
QV	48.721	45.6081	47.0211	46.0004	44.4668	46.5186	45.136

## Sheet: Supp Table 6. quast
Supplementary Table 6. Quality statistics of final assembly using Quast.

## Sheet: Supp Table 7. exclusive genes
	Supplementary 7. List of exclusive genes in barley/potato (By/Po) and soybean/winter rye (Sy/Wr) isolates.
Subgenome	By/Po Exclusive Genes	Subgenome	Sy/Wr Exclusive Genes
fast	Arylesterase	fast	Chlorogenic acid esterase
fast	5-methylthioadenosine/S-adenosylhomocysteine deaminase	fast	Circadian oscillator component FRQ
fast	Allergen Fus c 3	fast	Circadian oscillator component FRQ10
fast	ATP-dependent DNA helicase tlh1 (Fragment)	fast	Drimenol cyclase drtB
fast	Bifunctional pinoresinol-lariciresinol reductase 1	fast	High-affinity glucose transporter ght5
fast	FAD-dependent monooxygenase OpS4	fast	Nudix hydrolase 1
fast	Lactose permease	fast	Sodium/calcium exchanger MaX1
fast	Methyltransferase FGSG_00040	fast	Uncharacterized FAD-linked oxidoreductase ARB_02478
fast	N-malonyltransferase FDB2	fast/slow	D-xylose 1-dehydrogenase
fast	Peroxisomal multifunctional enzyme type 2	fast/slow	RNA-dependent RNA polymerase 1
fast	Phenol hydroxylase	fast/slow	Cytochrome P450 monooxygenase abl1
fast	Phosphatidylserine decarboxylase proenzyme 3	fast/slow	Hydroxylase/desaturase efuI
fast	PKS-NRPS hybrid synthetase cheA	fast/slow	Nucleotide-binding leucine-rich repeat (NLR)-like protein
fast	Probable zinc-binding oxidoreductase, mitochondrial	slow	Vegetative incompatibility protein HET-E-1
fast	Serine/threonine protein kinase AFUB_078980	slow	ADP-ribose glycohydrolase MACROD2
fast	Trichothecene biosynthesis transcription regulator TRI6	slow	Aspartate aminotransferase, cytoplasmic
fast	Trichothecene C-15 hydroxylase	slow	Oxidoreductase BOA1
fast	Vegetative incompatibility protein HET-E-1	slow	Trans-enoyl reductase tndF
fast/slow	Probable 3-hydroxyisobutyrate dehydrogenase, mitochondrial	slow	Fe(II)/2-oxoglutarate-dependent dioxygenase nvfI**
fast/slow	Vanillin dehydrogenase	slow	Putative disease resistance protein At3g14460**
slow	Oxidoreductase BOA1
slow	Transmembrane transporter
slow	Uncharacterized aminotransferase C1771.03c		*Unique to Po78
slow	ATP-dependent DNA helicase Q-like 3*		**Unique to SY357

## Sheet: Supp Figure 1. TRI8 alignment
Supplementary Figure 1. TRI8 protein sequence alignment of cross-infectivity and chemotype reference isolates. Isolates identified as 3-ADON by mycotoxin analysis grouped with 3-ADON reference strains, while 15-ADON isolates clustered with 15-ADON references.
Supplementary Figure 1. Multiple sequence alignment of the TRI8 protein from Fusarium graminearum cross-infectivity isolates and reference strains representing known chemotypes. Protein sequences were aligned using MAFFT v.7525 and visualized in Jalview v2.11.5.1. Isolates confirmed by mycotoxin analysis as 3-ADON and 15-ADON chemotypes cluster with their corresponding reference alleles (KSU23522…

## Sheet: Supp Figure 2. TRI Tree
Supplementary Figure 2. Phylogenetic relationships inferred from TRI8 protein sequences of Fusarium graminearum cross-infectivity isolates and reference strains with known chemotypes. The tree was constructed from the MAFFT-aligned TRI8 protein sequences using a distance-based method (neighbor-joining) and visualized in Jalview version 2.11.5.1. Isolates confirmed as 3-ADON and 15-ADON chemotypes…

## Sheet: Supp Figure 3. Fast_slow_assign
Supplementary Figure 3. Genome-wide fast (red) and slow (gray) subgenome assignments of seven cross-infectivity isolates. Each horizontal track represents an individual isolate, with a consensus track indicating the majority subgenome state per genomic window. All chromosomes are displayed on a shared genomic axis where subgenome regions extend only to the boundaries of each chromosome.

[truncated: 1 more sheets: Supp Figure 4. exclusive_genes_]
